# Supplementary material
Source: PubMed Central journal article supplement (PMC5136292)
Supplement: NIHMS69628-supplement-Supplementary_figure_1.pdf [file NIHMS69628-supplement-Supplementary_figure_1.pdf]

Figure 1d

Figure 1d

Figure 1d

Figure 1i

Figure 1i

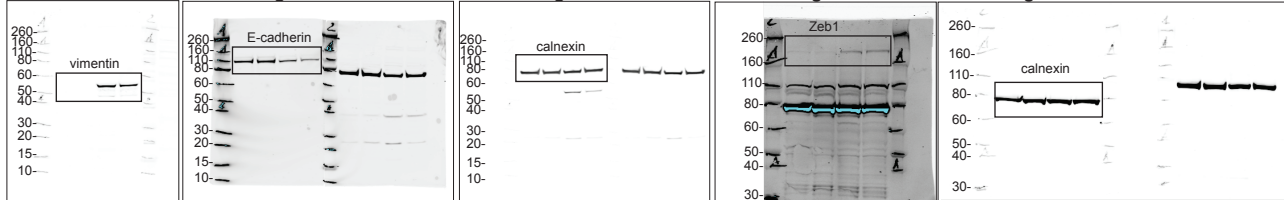

Figure 2d

Figure 3a

Ext Data Fig.1a

Ext Data Fig.1b

Ext Data Fig.1b

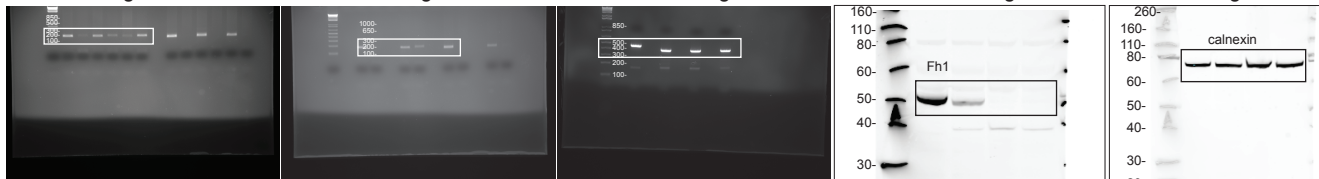

Ext Data Fig.3c

Ext Data Fig.3c

Ext Data Fig.3c

Ext Data Fig.3c

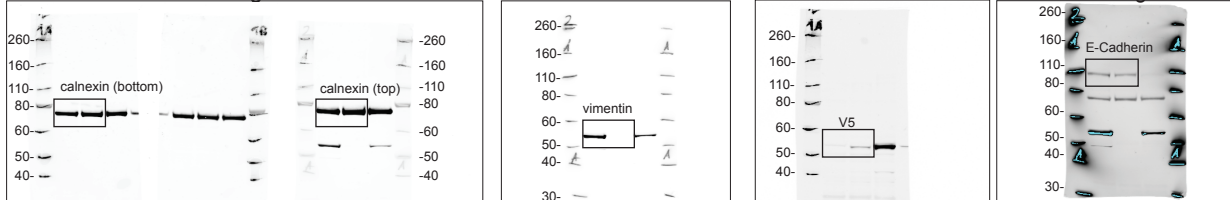

Ext Data Fig.5a

Ext Data Fig.5e

Ext Data Fig.5e

Ext Data Fig.5e

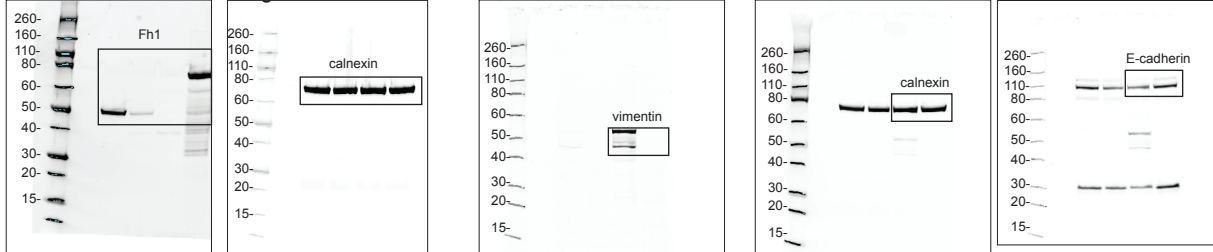

Ext Data Fig. 7c

Ext Data Fig. 7c

Ext Data Fig. 7c

Ext Data Fig. 9g

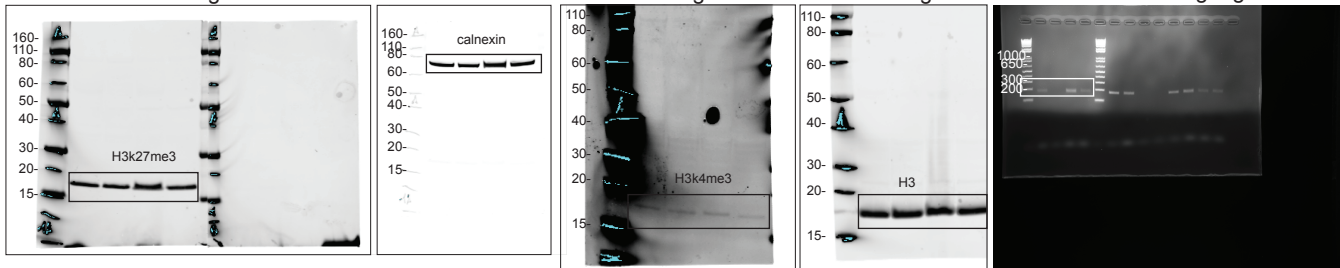

same samples loaded in parallel on the same gel
